# Supplementary material
Source: Springer Nature journal article supplement (https://www.springermedizin.de/resource/supplementary/12885_2012_4027_MOESM21_ESM.pdf/9465002)

# SHG-B and SHG-F “shadowing” by TEB

SHG-B/CA/SHG-F

**A**

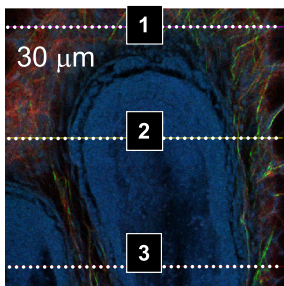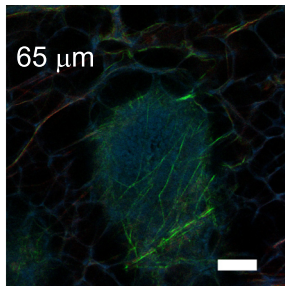

XY

**B**

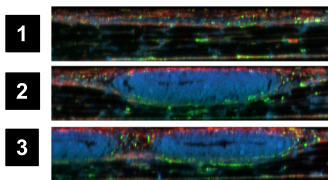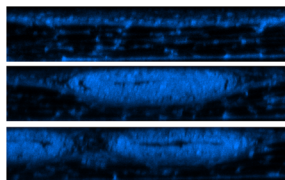

XZ

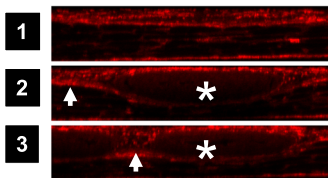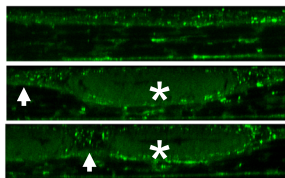

See 3D supplemental movies

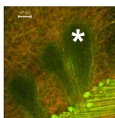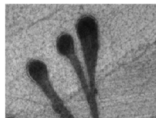

Supplement: MOESM21 [file 9465002]
